# Supplementary material for: Comparison of two closed-path cavity-based spectrometers for measuring air–water CO 2 and CH 4 fluxes by eddy covariance
Source: Copernicus journal article supplement (doi:10.5194/amt-9-5509-2016), 2016-11-18
Supplement: Supplementary file 1 [file Supplementary Data Readme.pdf › amt-2016-215 Supplementary data/Supplementary Data Readme.pdf]

Supplementary Data Readme for:

Comparison of two closed-path cavity based spectrometers for measuring  
air-water CO<sub>2</sub> and CH<sub>4</sub> fluxes by eddy covariance

Mingxi Yang<sup>1</sup>, John Prytherch<sup>2</sup>, Elena Kozlova<sup>3</sup>, Margaret J. Yelland<sup>4</sup>, Deepulal Parenkat  
Mony<sup>5</sup>, Thomas G. Bell<sup>1</sup>

<sup>1</sup> Plymouth Marine Laboratory, Prospect Place, Plymouth, UK

<sup>2</sup> Institute for Climate and Atmospheric Science, School of Earth and Environment, University of Leeds, Leeds, UK

<sup>3</sup> College of Life and Environmental Sciences, University of Exeter, North Park Road, Exeter, UK

<sup>4</sup> National Oceanography Centre, European Way, Southampton UK

<sup>5</sup> Inter University Centre for Development of Marine Biotechnology, School of Marine Sciences, Cochin University of Science and Technology, India

Correspondence to: Mingxi Yang (miya@pml.ac.uk)

Processed hourly eddy covariance fluxes can be found in the supplementary of this paper. Raw data files at 10 Hz are very large (tens of gigabytes) and currently not archived in an online database. Please contact us directly if you are interested in the raw data and we would be very happy to share them. There are two tab-delimited text files that tabulate the processed hourly data used in this paper: *Met and Physical Fluxes.txt* and *Gas Fluxes.txt*. In both files, missing data are denoted by NaN.

The data columns are described below.

For *Met and Physical Fluxes.txt*

|                       |                                                         |
|-----------------------|---------------------------------------------------------|
| MonthDayYear_TimeUTC: | Beginning time of an hourly interval                    |
| Wdir_deg:             | Wind direction in degrees                               |
| Wspd_m_s:             | Wind speed in m s <sup>-1</sup>                         |
| U10n_m_s:             | 10-m neutral wind speed in m s <sup>-1</sup>            |
| Tair_C:               | Air temperature in °C                                   |
| SST_C_L4:             | Near surface temperature at L4 buoy in °C               |
| Sal_L4:               | Near surface salinity at L4 buoy in °C                  |
| Pres_mbar:            | Atmospheric pressure in mbar                            |
| RH_percent:           | Relative humidity in %                                  |
| ustar_m_s:            | Eddy covariance u* in m s <sup>-1</sup>                 |
| CD10n_45_80:          | 10-m neutral drag coefficient from eddy covariance u*   |
| Hsb_EC_45_80:         | Eddy covariance sensible heat flux (W m <sup>-2</sup> ) |
| Hsb_pred_45_80:       | Predicted bulk sensible heat flux (W m <sup>-2</sup> )  |
| Hlb_pred_45_80:       | Predicted bulk latent heat flux (W m <sup>-2</sup> )    |

For *Gas Fluxes.txt*

|                       |                                                                                                                                                                |
|-----------------------|----------------------------------------------------------------------------------------------------------------------------------------------------------------|
| MonthDayYear_TimeUTC: | Beginning time of an hourly interval                                                                                                                           |
| CO2_dry_Flux_Picarro: | Dry CO <sub>2</sub> flux from the Picarro in mmol m <sup>-2</sup> day <sup>-1</sup>                                                                            |
| CO2_dry_Flux_LGR:     | 'Dry' CO <sub>2</sub> flux from the LGR in mmol m <sup>-2</sup> day <sup>-1</sup>                                                                              |
| CO2_Flux_LGR:         | Ambient CO <sub>2</sub> flux from the LGR in mmol m <sup>-2</sup> day <sup>-1</sup>                                                                            |
| CH4_dry_Flux_Picarro: | Dry CH <sub>4</sub> flux from the Picarro in mmol m <sup>-2</sup> day <sup>-1</sup>                                                                            |
| CH4_dry_Flux_LGR:     | 'Dry' CH <sub>4</sub> flux from the LGR in mmol m <sup>-2</sup> day <sup>-1</sup>                                                                              |
| CH4_Flux_LGR:         | Ambient CH <sub>4</sub> flux from the LGR in mmol m <sup>-2</sup> day <sup>-1</sup>                                                                            |
| H2O_Flux_LGR_lag3s:   | H <sub>2</sub> O flux from the LGR in mmol m <sup>-2</sup> day <sup>-1</sup> at a lag time of<br>~3 s (optimal lag time for CO <sub>2</sub> /CH <sub>4</sub> ) |
| H2O_Flux_LGR_lag20s:  | H <sub>2</sub> O flux from the LGR in mmol m <sup>-2</sup> day <sup>-1</sup> at a lag time of<br>~20 s (optimal lag time for H <sub>2</sub> O)                 |
