# Supplementary material for: Comparison of two closed-path cavity-based spectrometers for measuring air–water CO 2 and CH 4 fluxes by eddy covariance
Source: Copernicus journal article supplement (doi:10.5194/amt-9-5509-2016), 2016-11-18
Supplement: Supplementary file 2 [file amt-2016-215 Supplementary.pdf › amt-2016-215 Supplementary.pdf]

Figure S1 below shows the differences in  $\text{CO}_2$  and  $\text{CH}_4$  fluxes between the LGR (ambient and numerically dried) and Picarro (physically dried) plotted against the measured  $\text{H}_2\text{O}$  flux by the LGR. The LGR  $\text{H}_2\text{O}$  flux is computed at the optimal lag time for  $\text{H}_2\text{O}$  ( $\sim 20\text{s}$ ). These plots show the same qualitative trend as Figure 5 of the paper, i.e. the differences in  $\text{CO}_2$  and  $\text{CH}_4$  fluxes due to the  $\text{H}_2\text{O}$  correction increase with increasing  $\text{H}_2\text{O}$  flux.

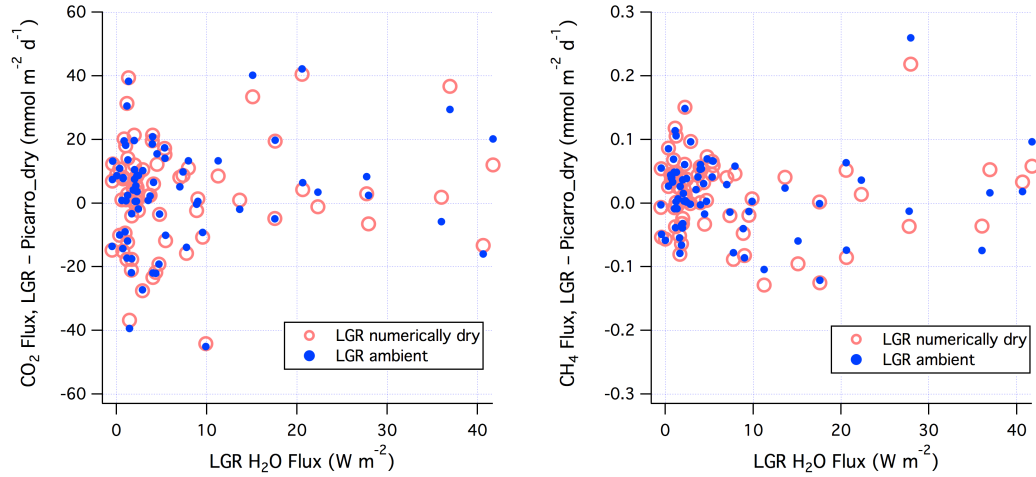

Figure S1. Differences in  $\text{CO}_2$  and  $\text{CH}_4$  fluxes between the LGR and Picarro vs. measured  $\text{H}_2\text{O}$  flux by the LGR.

Figure S2 below shows that measured LGR  $\text{H}_2\text{O}$  flux increases non-linearly with the predicted bulk  $\text{H}_2\text{O}$  flux. Attenuation of  $\text{H}_2\text{O}$  flux principally by the tubing was at least 80%.

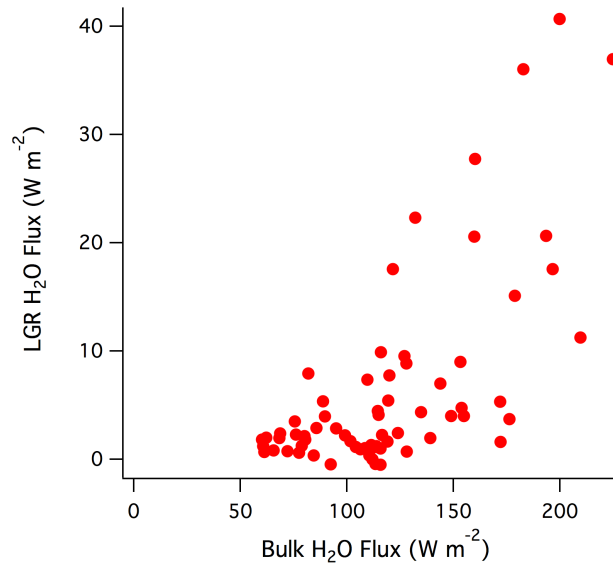

Figure S2. Measured  $\text{H}_2\text{O}$  flux by the LGR vs. predicted bulk  $\text{H}_2\text{O}$  flux for the air-water wind sector.
