# Supplementary material for: Comparison of two closed-path cavity-based spectrometers for measuring air–water CO 2 and CH 4 fluxes by eddy covariance
Source: Copernicus journal article supplement (doi:10.5194/amt-9-5509-2016), 2016-11-18
Supplement: Supplementary file [file amt-9-5509-2016-supplement-title-page.pdf › amt-9-5509-2016-supplement-title-page.pdf]

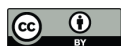

*Supplement of*

**Comparison of two closed-path cavity-based spectrometers for measuring air–water CO<sub>2</sub> and CH<sub>4</sub> fluxes by eddy covariance**

**Mingxi Yang et al.**

*Correspondence to:* Mingxi Yang (miya@pml.ac.uk)

- [amt-9-5509-2016-supplement-title-page.pdf](#)
- [amt-2016-215 Supplementary data.zip](#)
- [amt-2016-215 Supplementary.pdf](#)

The copyright of individual parts of the supplement might differ from the CC-BY 3.0 licence.
